# Supplementary material
Source: Springer Nature journal article supplement (https://www.springermedizin.de/resource/supplementary/12887_2010_471_MOESM6_ESM.pdf/9475224)

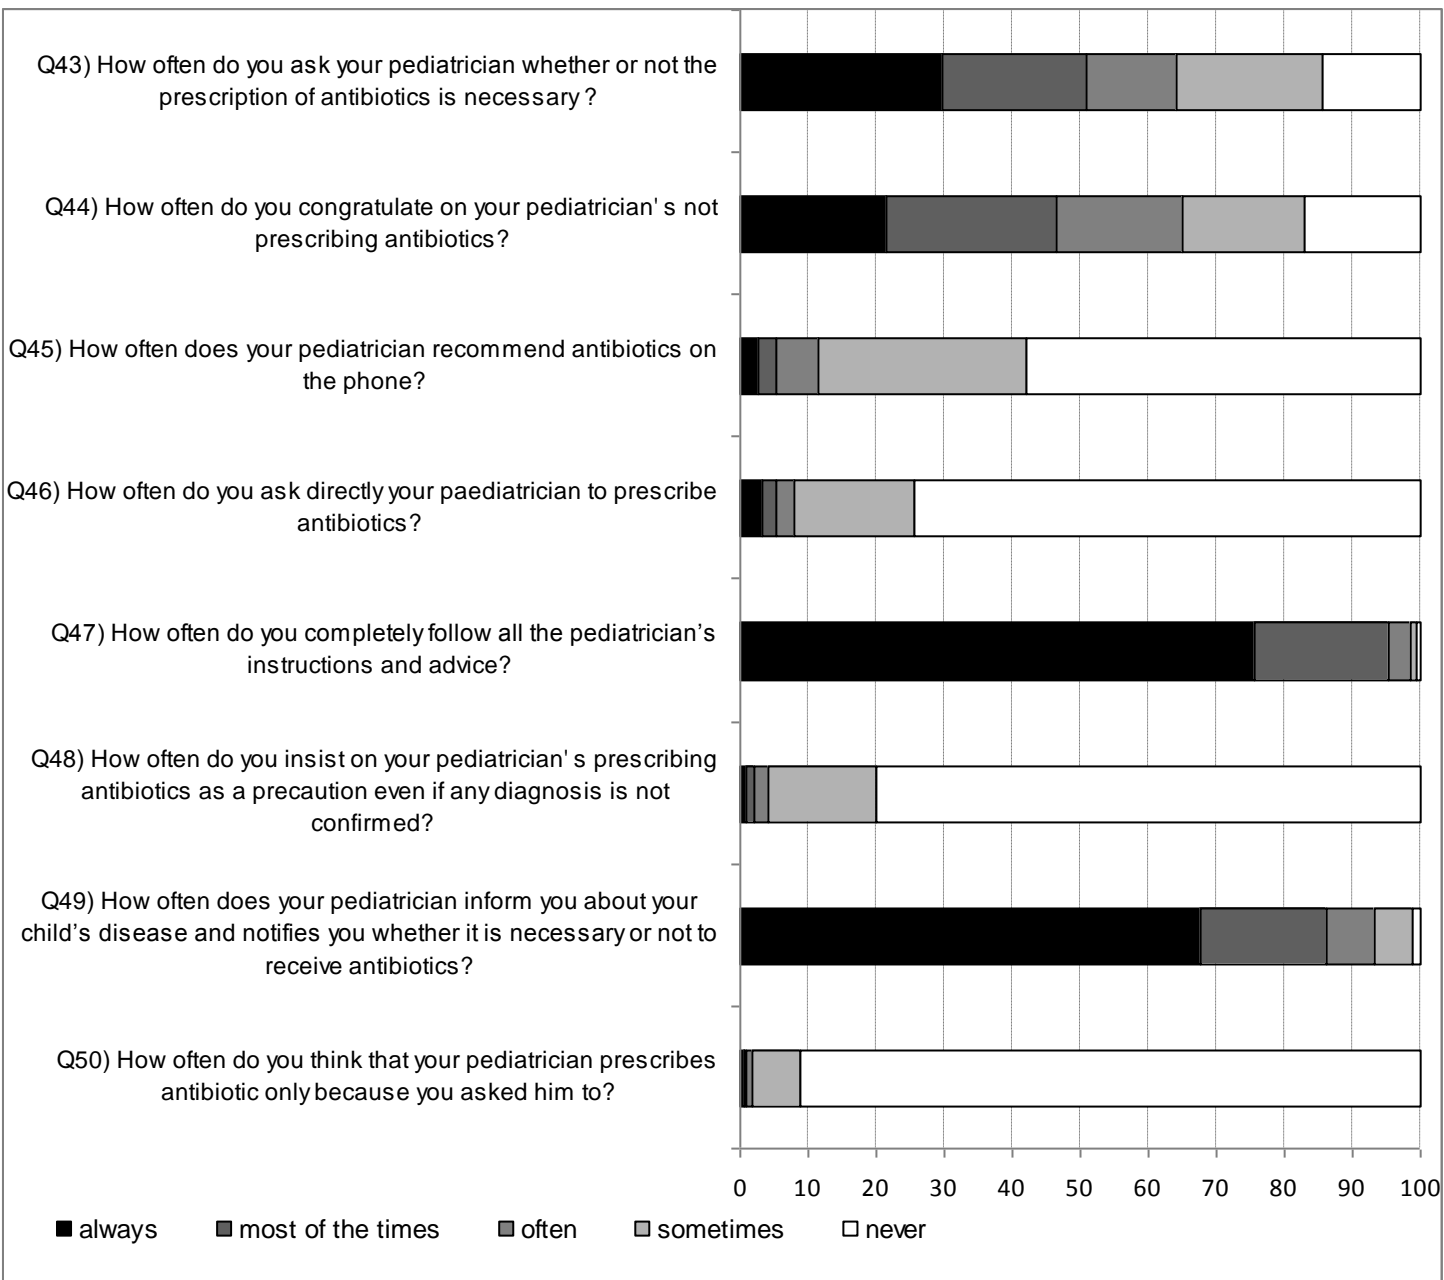

Supplement: MOESM6 [file 9475224]
